# Supplementary material for: Macroscopic Pattern Formation of Alginate Gels in a Two-Dimensional System
Source: MDPI journal article supplement (doi:10.3390/gels9060444), 2023-05-26
Supplement: s1 [file s1]

Supporting Information

# Macroscopic pattern formation of alginate gels in a two-dimensional system

Ryota Haraguchi, Yushi Oishi and Takayuki Narita\*

<sup>1</sup> Department of Chemistry and Applied Chemistry, Saga University, 1 Honjo, Saga, 840–8502, Japan; 22804003@edu.cc.saga-u.ac.jp (R.H.); oishiy@cc.saga-u.ac.jp (T.N.)

\* Correspondence: naritat@cc.saga-u.ac.jp; Tel.: +81-952-28-8805

## Contents

Figure S1: Higher quality images in Figs. 1(c) and (d).

Figure S2: Loss moduli  $G''$  of sodium alginate aqueous solution at various alginate concentrations and temperatures.

Figure S3: Storage moduli  $G'$  of sodium alginate aqueous solution at various alginate concentrations and temperatures.

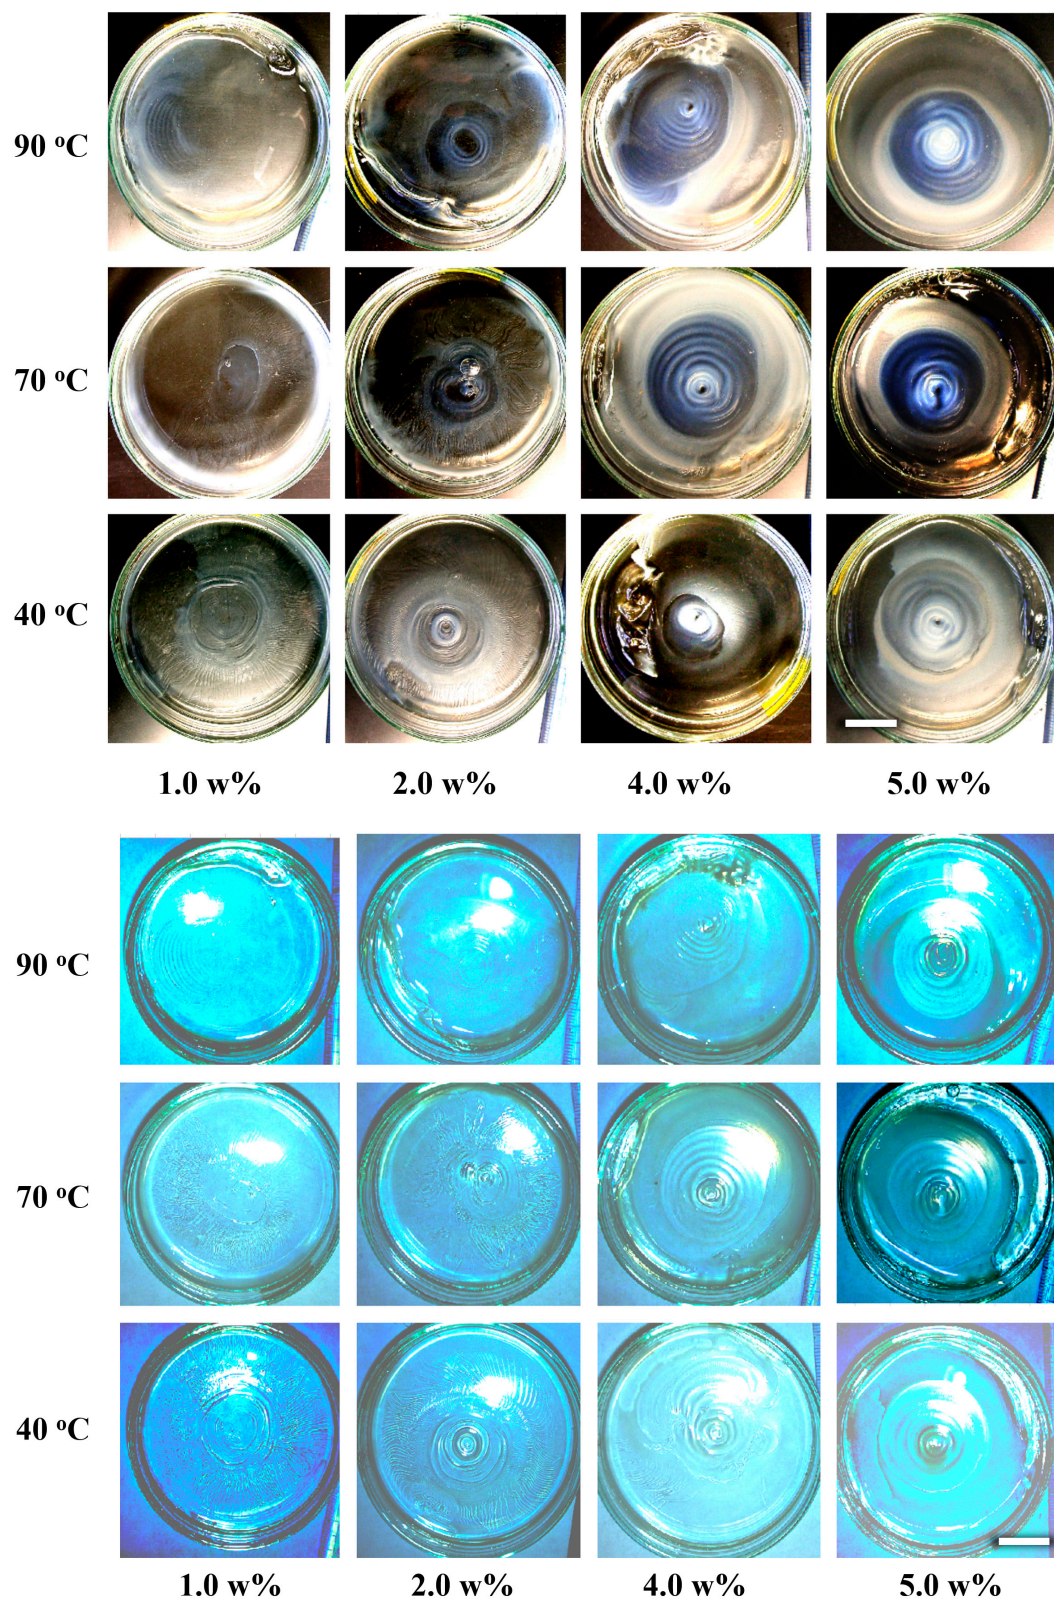

Figure S1: Higher quality images in Figs. 1(c) and (d).

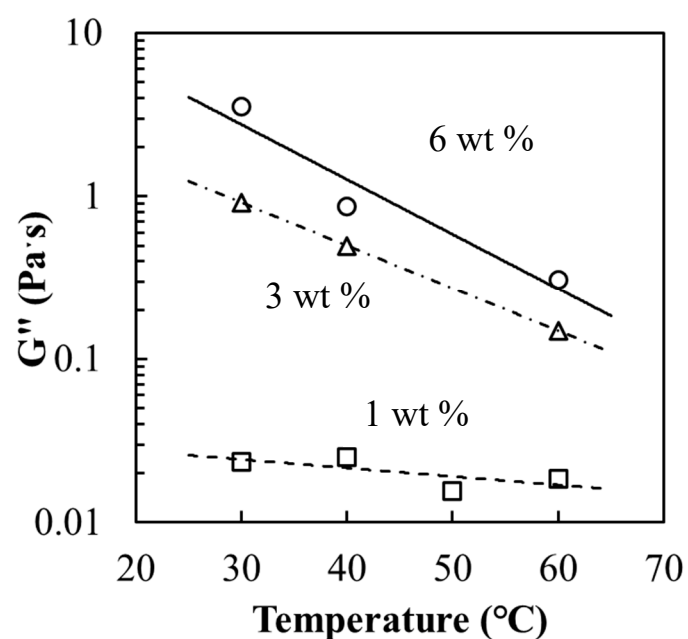

**Figure S2.** The effect of the alginate concentration and temperature on the loss modulus  $G''$  of sodium alginate solution. The  $G''$  values were determined using a rotary rheometer MCR-101 (Anton Paar, Graz, Austria) with plate-plate geometry (25 mm, 1 mm gap). Measurements were performed at given concentrations and temperatures controlled by pelche1 rad/s as the frequency with a strain value of 0.1%. The sample temperatures were controlled by a Peltier device at given temperatures.

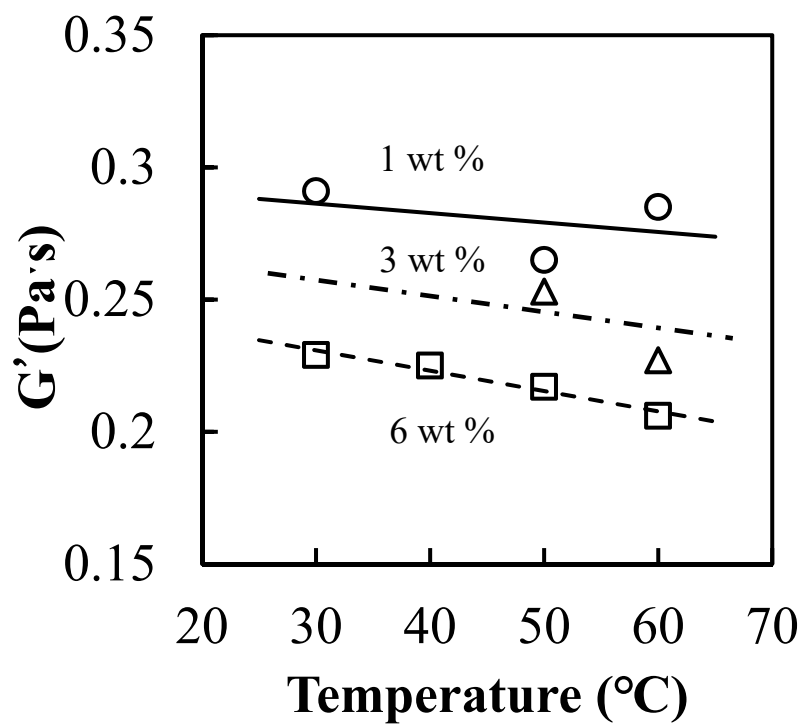

**Figure S3.** The effect of the alginate concentration and temperature on the storage modulus  $G'$  in sodium alginate solution on the concentration and temperature.  $G'$  were determined by the same method as Fig. S2.
